# Supplementary material for: Painting a specific chromosome with CRISPR/Cas9 for live-cell imaging
Source: PubMed Central journal article supplement (PMC5339855; doi:10.1038/cr.2017.9), 2017-01-13
Supplement: cr20179x4.pdf [file cr20179x4.pdf]

**SUPPLEMENTARY FIGURES**

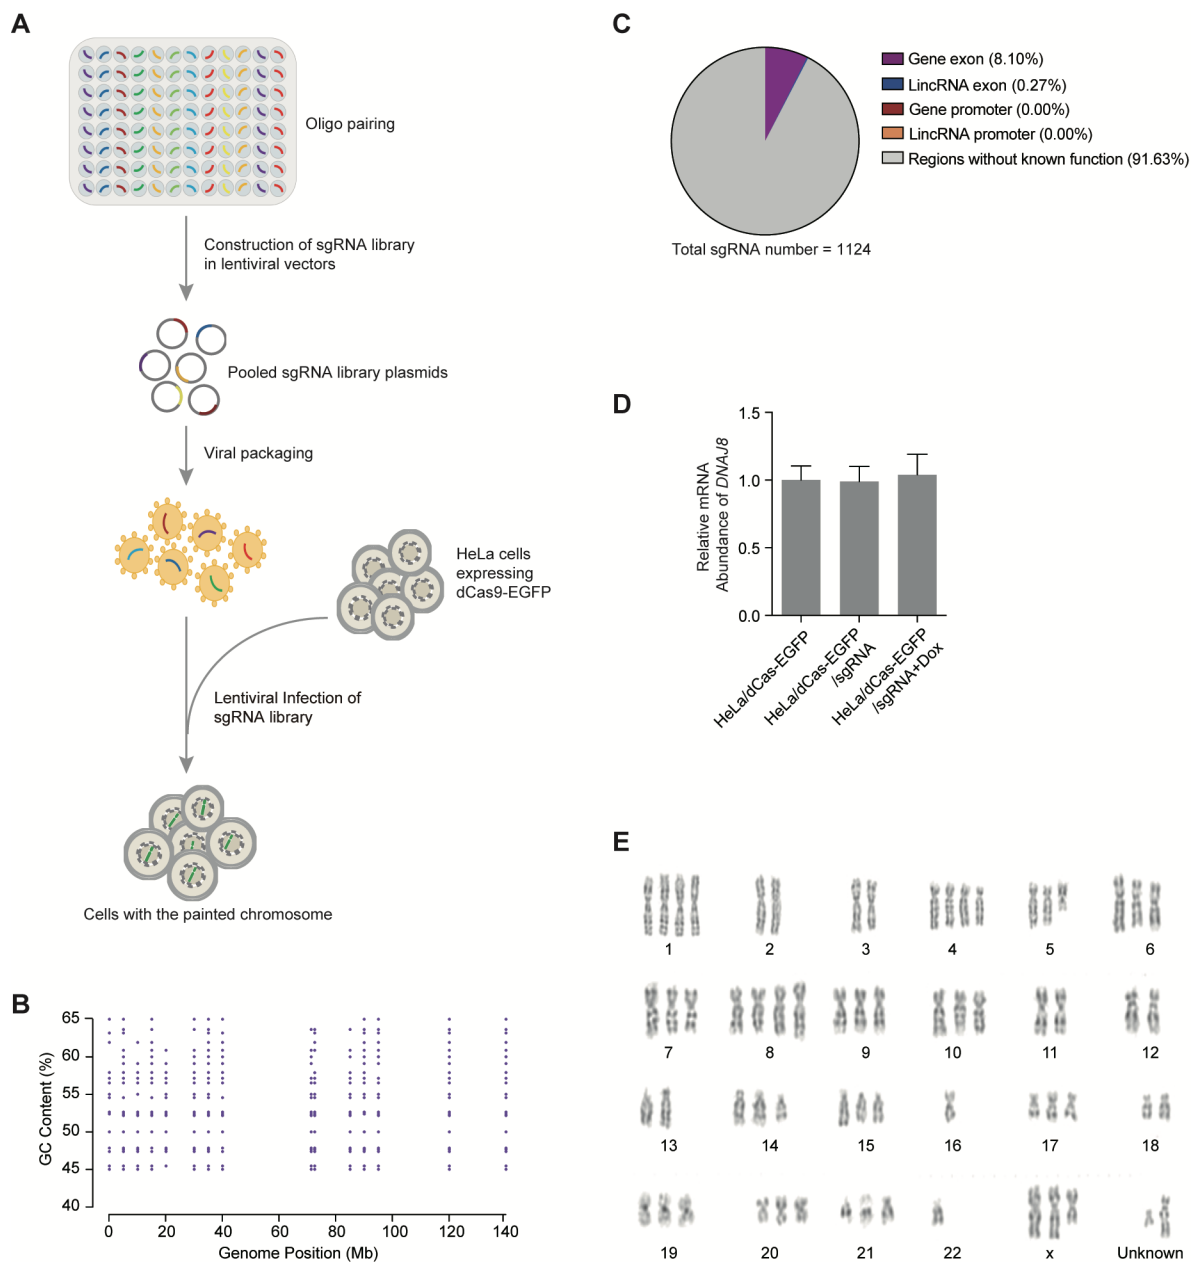

**Supplementary information, Figure S1** Design and construction of CRISPR/Cas-mediated chromosome painting system. **(A)** Schematic of the CRISPR/Cas imaging system construction. Each complimentary pair of synthesized single-stranded sgRNA oligonucleotides were annealed separately. The double-stranded sgRNA oligos were ligated into the sgRNA expression plasmid. The library of plasmids of different sgRNAs were then mixed together to generate high titer lentivirus. A HeLa cell line stably expressing dCas9-EGFP was then infected three times by the sgRNA lentivirus to realize chromosome painting in live cells. **(B)** Scatter plot for the GC contents of sgRNA sequences. The x axis represents the position on human Chr. 9. **(C)** A pie chart for the distribution of sgRNA binding sites in gene context, including protein coding genes and long intergenic noncoding RNAs (lincRNAs). Most (91.63%) of the binding sites of sgRNAs were not overlapped with promoter or exon genes. **(D)** mRNA levels of *DNAJB5* (normalized to *GAPDH*) in lentivirus infected cells and Chr. 9 labeling cells, quantified by real-time PCR analysis. No obvious expression differences were observed. **(E)** Karyotype of dCas9-EGFP expressed HeLa cell line. Unknown indicates that the chromosome or segment doesn't have a typical G-bands, which is not caused by translocation of Chr. 9 with any other chromosomes.
